# Supplementary material
Source: publisher figshare collection journal article supplement (https://acs.figshare.com/ndownloader/files/4082164)
Supplement: Supplementary file 1 [file 4082164]

## Supporting Information

# Synthesis and Enhanced Cr(VI) Photoreduction Property of Formate Anion Containing Graphitic Carbon Nitride

Guohui Dong, and Lizhi Zhang\*

Key Laboratory of Pesticide & Chemical Biology of Ministry of Education, Institute of Environmental

Chemistry, College of Chemistry, Central China Normal University, Wuhan 430079, P. R. China

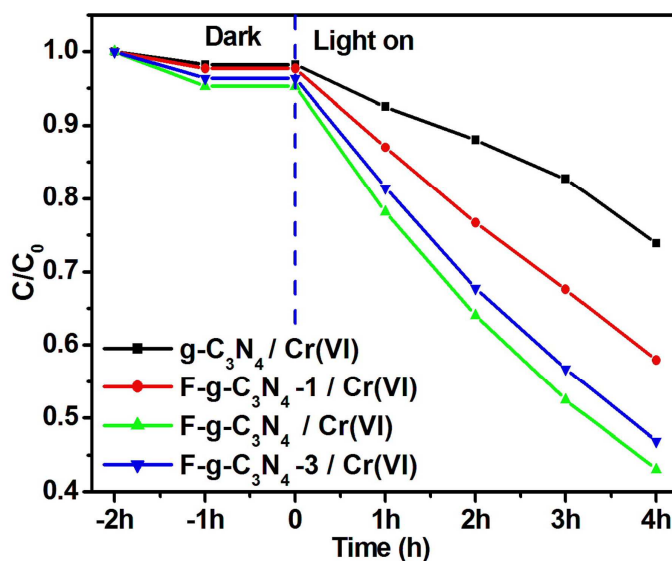

**Figure S1.** The photoreduction of Cr(VI) in the presence of different photocatalysts under visible light. F-g-C<sub>3</sub>N<sub>4</sub>-1, F-g-C<sub>3</sub>N<sub>4</sub> and F-g-C<sub>3</sub>N<sub>4</sub>-3 represent formate anion included g-C<sub>3</sub>N<sub>4</sub> samples and the mass ratios of sodium formate and g-C<sub>3</sub>N<sub>4</sub> were 1 : 100, 2 : 100 and 3 : 100, respectively.

\* To whom correspondence should be addressed. E-mail: [zhanglz@mail.ccnu.edu.cn](mailto:zhanglz@mail.ccnu.edu.cn). Phone/Fax: +86-27-6786 7535

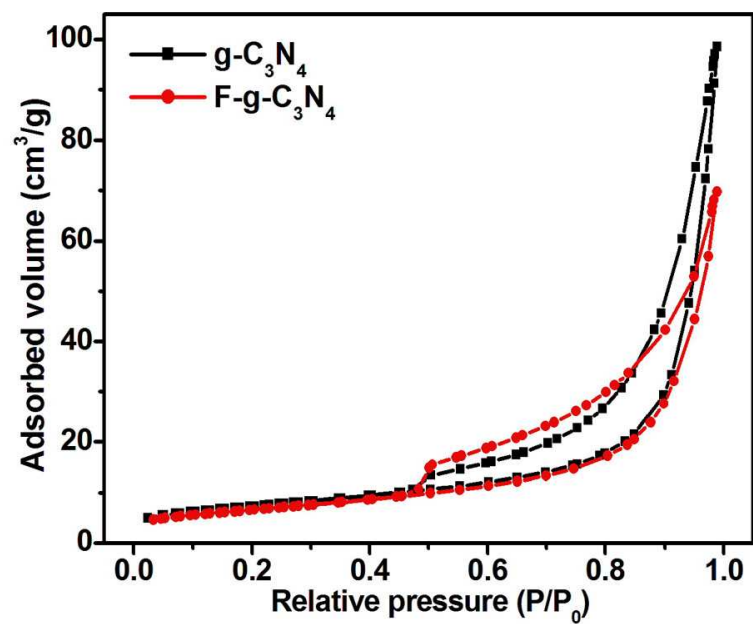

**Figure S2.** N<sub>2</sub> adsorption-desorption isotherms of g-C<sub>3</sub>N<sub>4</sub> and F-g-C<sub>3</sub>N<sub>4</sub>.

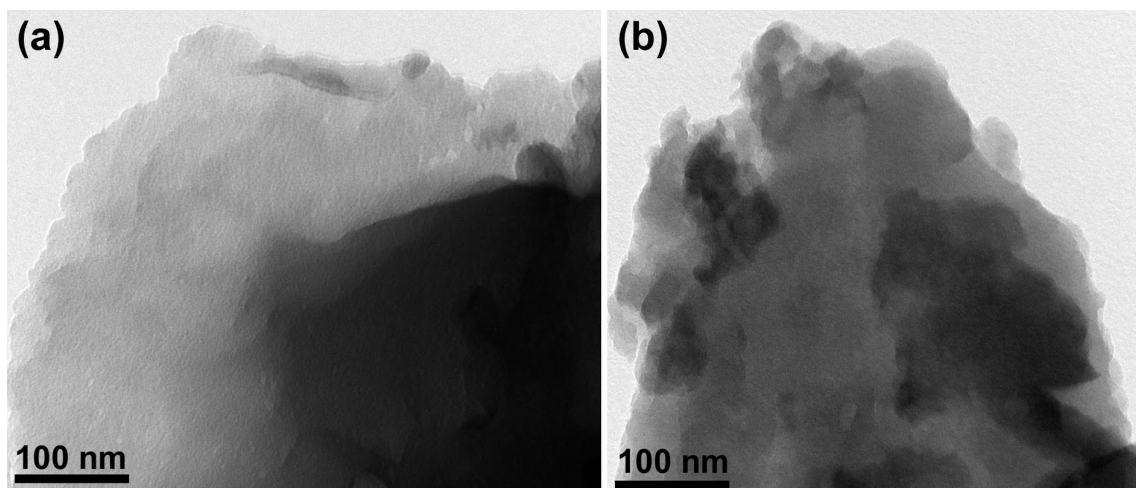

**Figure S3.** TEM images of g-C<sub>3</sub>N<sub>4</sub> (a) and F-g-C<sub>3</sub>N<sub>4</sub> (b).

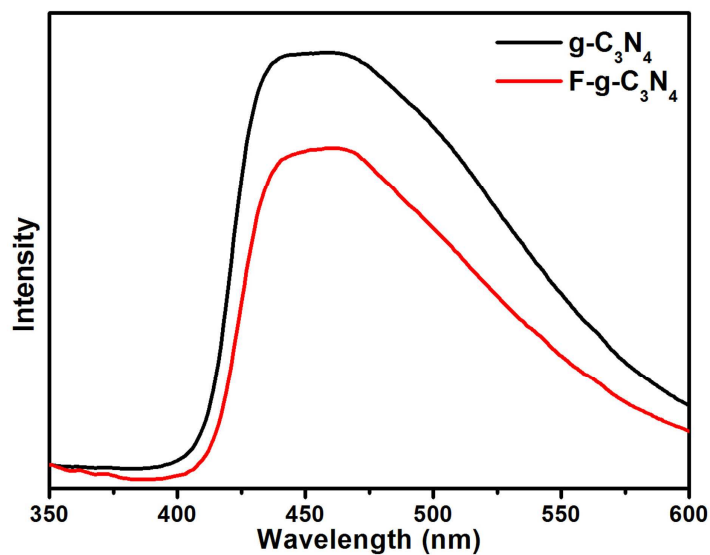

**Figure S4.** PL spectra of  $\text{g-C}_3\text{N}_4$  and  $\text{F-g-C}_3\text{N}_4$ .

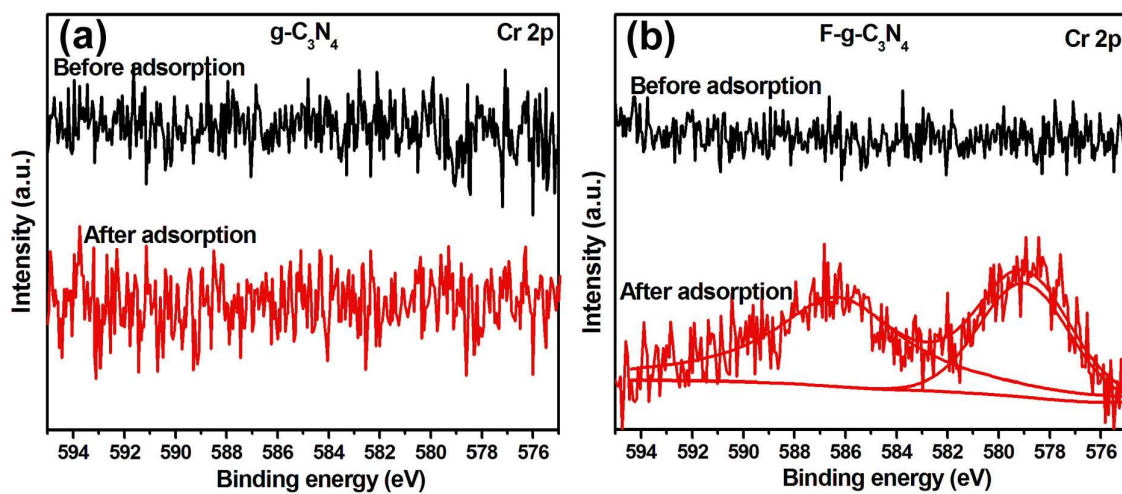

**Figure S5.** High-resolution XPS spectra of Cr 2p of  $\text{g-C}_3\text{N}_4$  and  $\text{F-g-C}_3\text{N}_4$  before and after Cr(VI) adsorption.
